# Supplementary material for: Association of Polypharmacy with Colorectal Cancer Survival Among Older Patients
Source: PubMed Central journal article supplement — Oncologist. 2021 Sep 20;26(12):e2170–80. doi: 10.1002/onco.13961 (PMC8649018; doi:10.1002/onco.13961), 2021-09-20
Supplement: ONCO-26-e2170-s001.pdf [file ONCO-26-e2170-s001.pdf]

Supplemental Figures for:  
Association of polypharmacy with colorectal cancer survival among older patients  
Ben Schöttker et al.

**Figure S1. Illustration of study timeline and collection of data in the DACHS study**

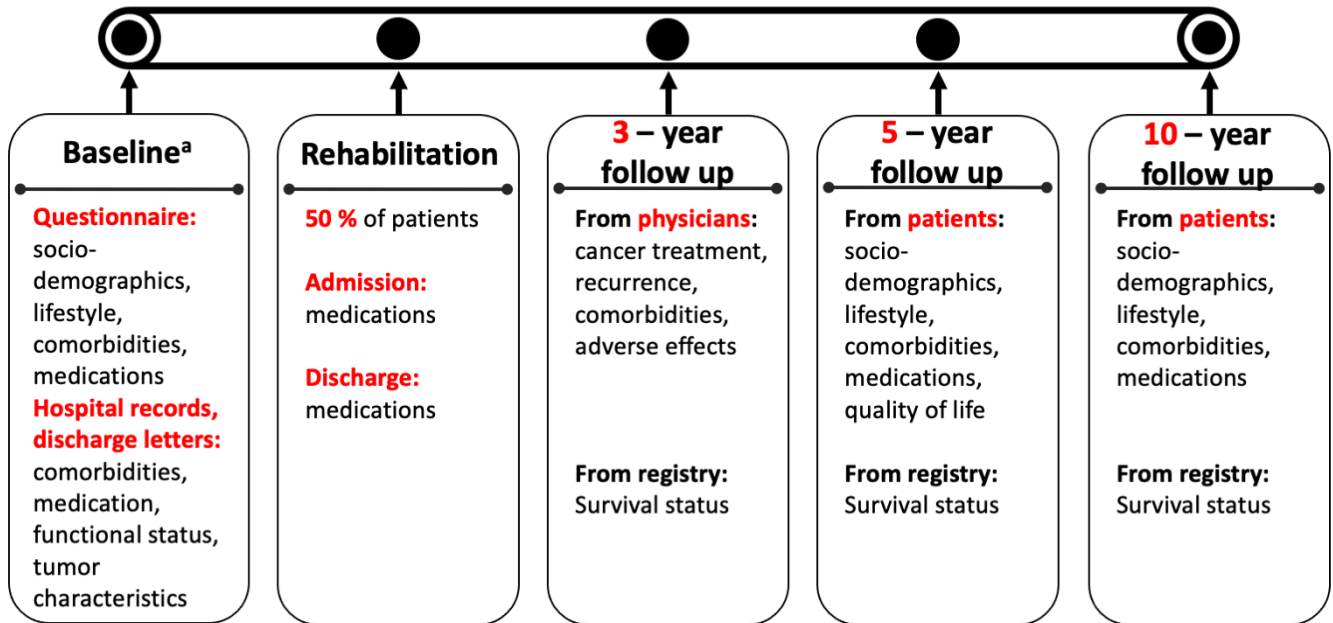

<sup>a</sup> Baseline interview was conducted during hospital stay for colorectal cancer surgery or some days/weeks afterwards.

**Figure S2. Flow chart of the study population**

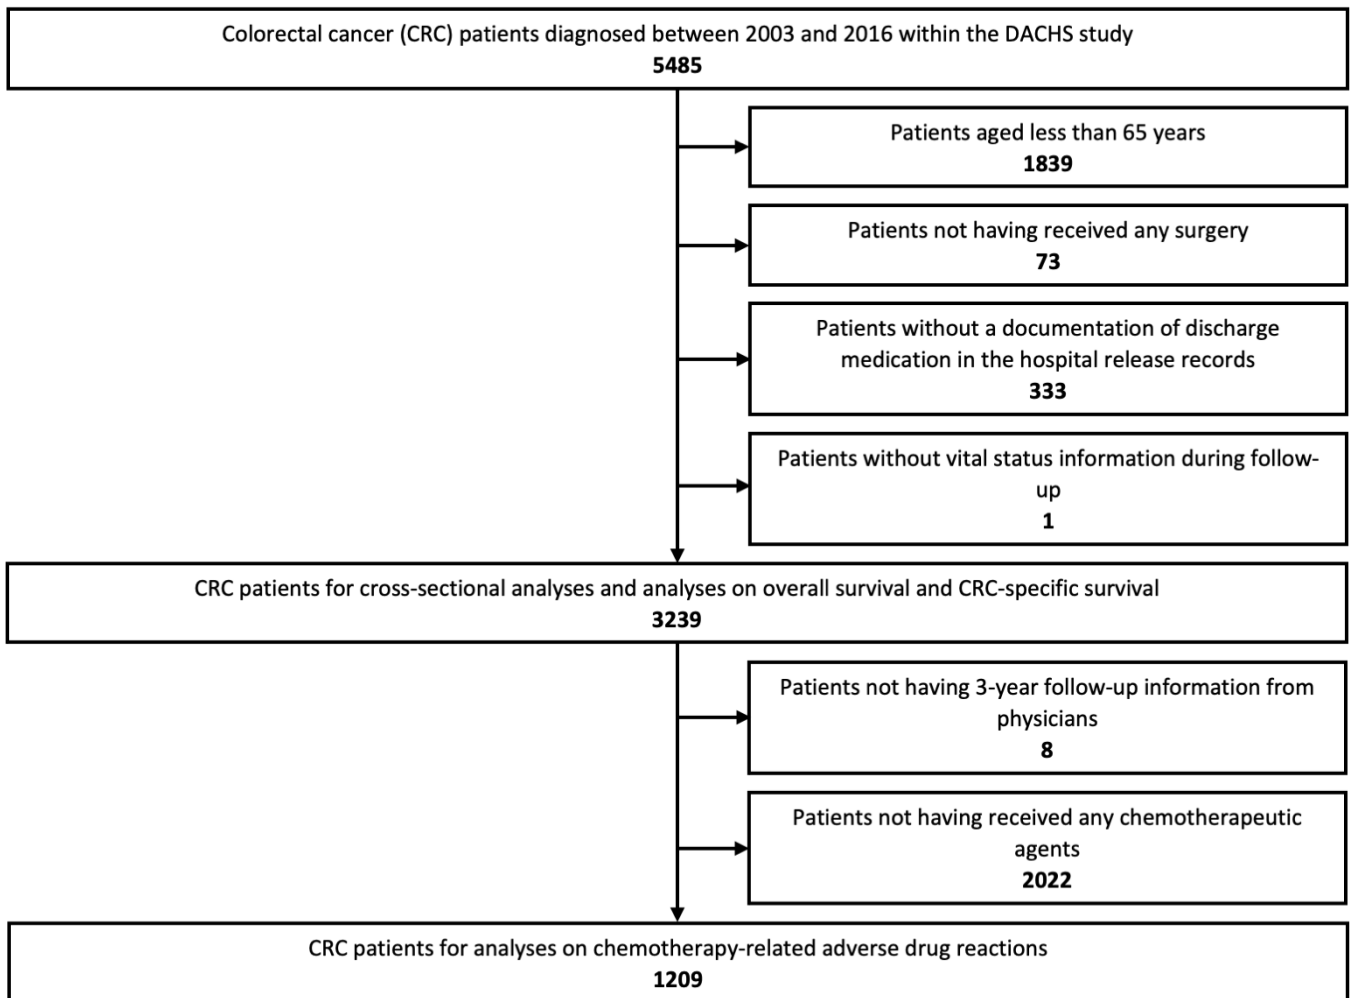

Figure S3. Distribution of number of medications when counting all drugs without exclusions

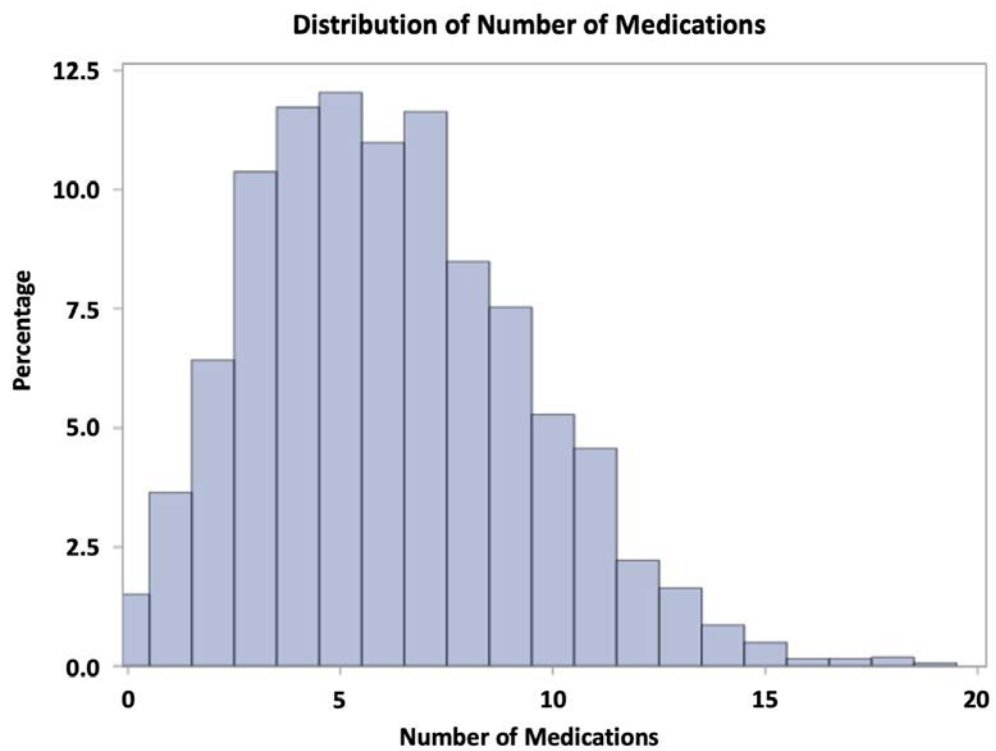

Figure S4. Dose-response curves for the associations of the number of drugs (all counted without exclusions) with overall, colorectal cancer specific, and non-cancer specific survival in model 2 (without adjustment for functional status and comorbidity) and model 3 (full model)<sup>a</sup>

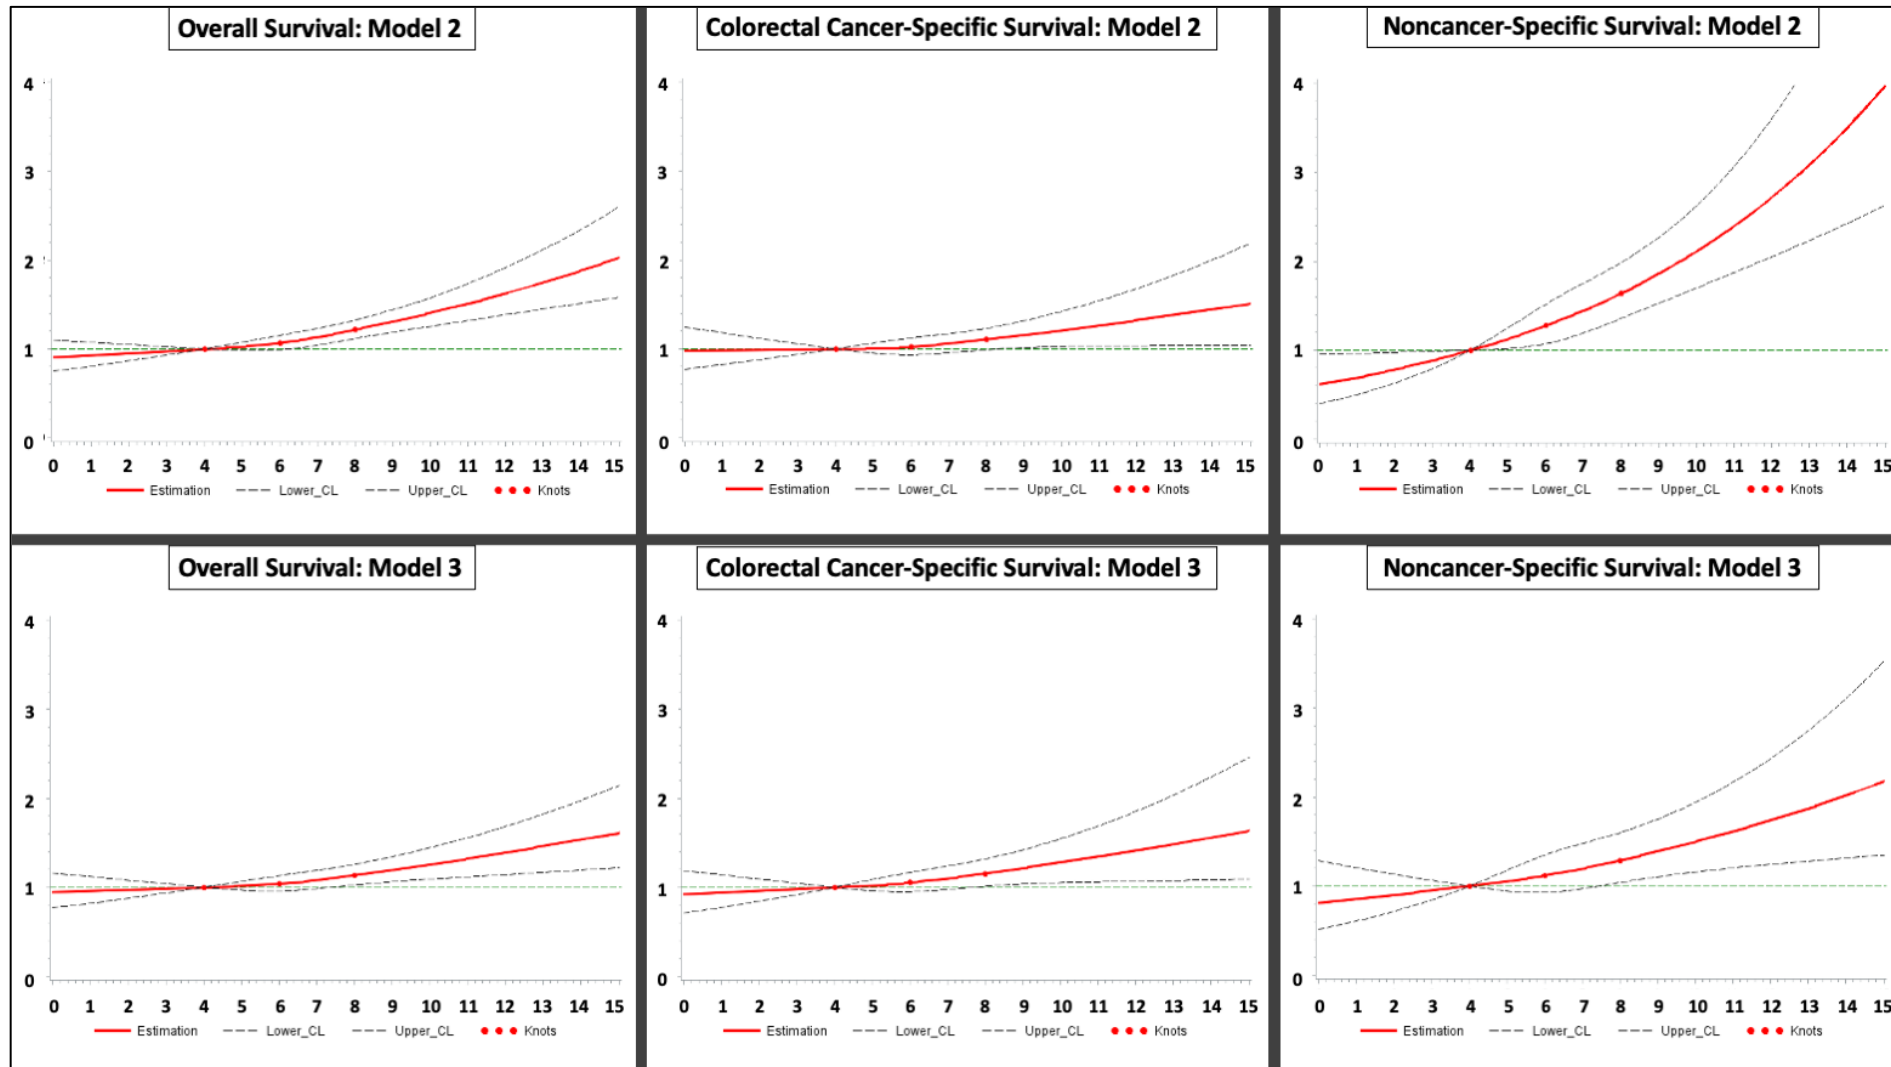

<sup>a</sup> The dose-response curves were obtained from the imputation dataset 1.
