# Supplementary material for: Association of Polypharmacy with Colorectal Cancer Survival Among Older Patients
Source: PubMed Central journal article supplement — Oncologist. 2021 Sep 20;26(12):e2170–80. doi: 10.1002/onco.13961 (PMC8649018; doi:10.1002/onco.13961), 2021-09-20
Supplement: ONCO-26-e2170-s002.pdf [file ONCO-26-e2170-s002.pdf]

Supplemental Tables for:

Association of polypharmacy with colorectal cancer survival among older patients

Ben Schöttker et al.

**Table S1. List of ATC codes or ATC code groups of combination drugs containing 2 or 3 active substances for the modified polypharmacy definition**

| Combination drugs              | ATC codes                                                                                                                                                                                                                                                                                                                                                                                                                                                                                                                                                                                                                                                                                                                                                                                                                                                                                                                                                                                                                                                                                                                                                                                                                                                                                                                                                                                                                                                                                                                                                                                                                                                                                                                                                                                                                                                                                                                                                                                                                                                                                                                                                                                                                                                                                                                                                                                                                                                                                                                                                                                                                                                                                                                                                                                                                                                                                                                                                                                                                                                                                                                                                                                                                                                                                                                                                                                                                                                                                                                                                                                                                                                                                                                                                                                                                                              |
|--------------------------------|--------------------------------------------------------------------------------------------------------------------------------------------------------------------------------------------------------------------------------------------------------------------------------------------------------------------------------------------------------------------------------------------------------------------------------------------------------------------------------------------------------------------------------------------------------------------------------------------------------------------------------------------------------------------------------------------------------------------------------------------------------------------------------------------------------------------------------------------------------------------------------------------------------------------------------------------------------------------------------------------------------------------------------------------------------------------------------------------------------------------------------------------------------------------------------------------------------------------------------------------------------------------------------------------------------------------------------------------------------------------------------------------------------------------------------------------------------------------------------------------------------------------------------------------------------------------------------------------------------------------------------------------------------------------------------------------------------------------------------------------------------------------------------------------------------------------------------------------------------------------------------------------------------------------------------------------------------------------------------------------------------------------------------------------------------------------------------------------------------------------------------------------------------------------------------------------------------------------------------------------------------------------------------------------------------------------------------------------------------------------------------------------------------------------------------------------------------------------------------------------------------------------------------------------------------------------------------------------------------------------------------------------------------------------------------------------------------------------------------------------------------------------------------------------------------------------------------------------------------------------------------------------------------------------------------------------------------------------------------------------------------------------------------------------------------------------------------------------------------------------------------------------------------------------------------------------------------------------------------------------------------------------------------------------------------------------------------------------------------------------------------------------------------------------------------------------------------------------------------------------------------------------------------------------------------------------------------------------------------------------------------------------------------------------------------------------------------------------------------------------------------------------------------------------------------------------------------------------------------|
| Containing 2 active substances | <p>A03C, A03D, A03E, A05C, A07C, A11A, A11J, C02N, C03E, C04B, C07B, C07C, C07E, C07G, D06C, D07B, D07C, D07X, G03E, G03F, H02B, J01R, M01B, N06C, R05F, R05G, S02C, S03C,</p> <p>A02AD, A02AF, A02AG, A02AX, A05AC, A09AC, A10BD, A11CB, A11EB, A11EC, A11ED, A11EX, A11GB, A12AX, B03AD, C01EX, C02LB, C02LE, C02LF, C02LK, C02LL, C02LN, C02LX, C03AB, C03AH, C03AX, C03BB, C03BK, C03CB, C07FA, C09BA, C09BB, C09DA, C09DB, C10BA, C10BB, C10BE, C10BP, D10AA, G01BA, G01BC, G01BD, G01BF, G02AC, G03AA, G03AB, G03CC, G03HB, J01CR, J01EE, L01XY, N01AG, N02AG, N05CB, N05CX, R01AB, R03AH, R03AK, R03AL, R03DB, R06AK, S01BB, S01BX, S01CB, S01CC, V06DA, V06DB, V06DD, V06DE, V06DX,</p> <p>A01AA30, A01AA51, A01AB50, A01AB53, A01AB57, A01AB62, A01AB75, A01AB76, A01AB78, A01AB84, A01AB85, A01AB88, A01AB90, A01AC54, A01AD50, A01AD65, A01AD69, A01AD71, A01AE51, A01AE52, A01AE53, A01AE54, A01AE55, A01AH20, A01AP30, A01AP50, A01AP52, A02AA10, A02AB10, A02AC10, A02AD01, A02AD10, A02AH20, A02BA51, A02BA53, A02BX50, A02BX51, A02BX62, A02BX63, A02BX70, A02BX71, A02BX77, A02XA52, A02XA53, A02XH20, A02XH50, A02XP30, A03AB53, A03AH20, A03AP30, A03AX20, A03AX50, A03AX58, A03AX63, A03BA20, A03FA51, A03FA54, A03FP30, A03HH20, A04AB52, A04AB54, A04AB55, A04AB56, A04AB57, A04AB58, A04AD50, A04AD51, A04AD54, A04AH20, A05AA20, A05AA54, A05AA55, A05AB20, A05AH20, A05AP30, A05AX50, A05BA09, A05BA50, A05BA60, A05BA61, A05BA63, A05BA66, A05BA67, A05BA71, A05BH20, A05BP51, A06AA51, A06AB20, A06AB30, A06AB52, A06AB53, A06AB56, A06AB57, A06AB58, A06AB59, A06AB60, A06AB63, A06AC51, A06AC53, A06AC55, A06AC59, A06AD10, A06AD61, A06AD65, A06AG03, A06AG10, A06AG11, A06AG20, A07AA51, A07AA54, A07AA54, A07AB50, A07AX51, A07AX55, A07BA51, A07BB51, A07BC30, A07BC51, A07BC54, A07BC55, A07BP51, A07DA51, A07DA52, A07DA53, A07DA54, A07EA51, A07FA20, A07FA50, A07FA51, A07FA52, A07XA50, A07XA51, A07XH20, A07XP30, A08AA53, A08AA53, A08AA56, A08AA57, A08AA63, A08AB20, A08AH20, A09AA50, A09AA52, A09AA57, A09AB50, A09AH20, A09AX50, A10AB30, A10AC30, A10AD06, A10AD30, A10AE30, A10AE56, A10BH51, A10XH20, A10XP30, A11CC20, A11CC80, A11DB01, A12AA20, A12AH20, A12BA30, A12BA51, A12BA52, A12BA54, A12CC30, A12CC50, A12CD51, A12CD52, A12CH20, A12CX50, A13AH20, A13AP30, A14AA50, A15AA50, A15AA51, A16AA50, B01AB51, B01AB63, B01AC30, B01AC34, B01AC36, B01AC56, B01AD51, B02BC30, B02BC51, B02BC57, B02BD01, B02BD06, B02BP50, B03AA20, B03AA50, B03AE03, B03AE10, B03BA51, B03BA53, B03BB51, B03XH20, B05AA51, B05AA55, B05AA56, B05AA57, B05BA10, B05BB04, B05BB10, B05BB53, B05BC51, B05BC53, B05CA10, B05CB10, B05CX10, B05DB50, B05XA06, B05XA30, B05XA31, B05XC30, B05XX03, B05ZA50, B05ZB50, B06AA02, B06AA55, C01AA20, C01AA52, C01AA54, C01AA55, C01AA56, C01AA58, C01AB51, C01AC51, C01AC54, C01AC55, C01AC71, C01AH20, C01AH50, C01AP30, C01AP50, C01AP51, C01AP52, C01AP53, C01BA50, C01BA51, C01BA70, C01BA71, C01CA30, C01CA50, C01CA51, C01CA55, C01CA58, C01CA68, C01CA81, C01CB51, C01CB54, C01CH20, C01DA20, C01DA52, C01DA54, C01DA55, C01DA57, C01DA58, C01DA59, C01DA63, C01DA70, C01DX51, C01DX52, C01DX53, C01DX54, C01DX55, C01DX72, C01EH20, C01EH50, C01EP30, C01EP51, C02AA03, C02AA52, C02AA53, C02AA57, C02AP51, C02KH20, C02KP30, C02KP52, C02LA01, C02LA02, C02LA03, C02LA04, C02LA07, C02LA08, C02LA09, C02LA50, C02LC01, C02LC05, C02LG01, C02LG02, C02LG03, C03BA82, C03XH20, C03XP30, C04AA52, C04AA81, C04AC20, C04AC51, C04AC52, C04AC53, C04AC58, C04AD50, C04AD54, C04AD56, C04AE51, C04AE54, C04AF51, C04AH20, C05AA51, C05AA54, C05AA55, C05AA56, C05AA58, C05AA60, C05AA61, C05AA62, C05AA64, C05AA65, C05AD20, C05AD51, C05AD53, C05AD54, C05AD55, C05AD58, C05AD59, C05AD60, C05AD61, C05AD62, C05AF51, C05AH20, C05AP30, C05AP52, C05AX02, C05AX03,</p> |

---

**Combination drugs    ATC codes**

---

Containing 2 active substances

C05AX13, C05BA51, C05BA53, C05BA54, C05BA55, C05BB56, C05BP30, C05BP51, C05BP52, C05BX51, C05BZ20, C05BZ59, C05CA20, C05CA51, C05CA53, C05CA54, C05CA57, C05CA59, C05CH20, C05CH50, C05CP30, C05CP50, C05CP51, C05CP52, C05CP53, C05CP54, C05CX54, C06AA50, C06AH20, C07AA57, C07AB52, C07AB57, C07FB02, C07FB03, C07FB07, C07FB22, C07FB23, C07FB24, C07FB26, C08CA55, C08DA51, C08DA81, C08GA01, C08GA02, C08GA23, C09DX02, C09XA52, C09XA53, C10AD52, C10BX01, C10BX02, C10BX03, C10BX05, D01AA20, D01AA51, D01AA91, D01AC20, D01AC51, D01AC52, D01AC53, D01AC60, D01AE20, D01AE51, D01AE54, D01AE62, D01AE68, D01AE74, D01AE75, D02AA20, D02AB51, D02AB52, D02AC52, D02AC54, D02AE51, D02AP53, D02AX20, D02BA20, D02BB51, D03AA51, D03AC50, D03AH20, D03AP30, D03AP51, D03AP52, D03AP54, D03AP57, D03AX50, D03AX53, D03AX69, D03AX70, D03AX71, D03AX77, D03AX79, D03BA20, D03BA50, D03BA52, D03BA53, D03BA54, D03BA55, D04AA82, D04AA91, D04AB51, D04AB54, D04AB61, D04AH20, D04AX51, D04AX54, D04AX55, D05AA50, D05AA51, D05AA52, D05AC51, D05AX51, D05AX52, D05AX56, D05BH20, D05BX51, D06AA20, D06AX20, D06AX52, D06AX54, D06AX58, D06AX64, D06BA50, D06BA51, D06BA55, D06BA62, D06BA63, D06BA64, D06BB20, D06BB53, D06BB65, D07AB30, D08AB52, D08AC52, D08AC54, D08AC55, D08AE50, D08AE51, D08AE53, D08AE56, D08AE57, D08AG52, D08AH51, D08AH53, D08AH60, D08AJ51, D08AJ53, D08AJ57, D08AJ58, D08AJ59, D08AJ60, D08AK52, D08AK60, D08AL50, D08AX30, D08AX51, D08AX53, D08AX55, D08AX69, D09AA30, D09AA51, D09AA65, D09AC50, D10AD51, D10AD52, D10AD53, D10AD54, D10AE51, D10AF51, D10AF52, D10AF53, D10AF54, D10AX30, D10AX52, D10AX59, D10AX60, D10AX61, D10AX62, D10BH20, D10BX50, D11AA50, D11AA51, D11AA52, D11AA53, D11AB30, D11AB50, D11AB51, D11AB55, D11AB56, D11AB58, D11AB61, D11AB62, D11AB63, D11AC50, D11AC52, D11AC58, D11AC61, D11AF51, D11AF52, D11AF55, D11AG50, D11AX50, D11AX52, D11AX57, D11BH20, D11BH51, G01AA20, G01AA51, G01AA64, G01AE10, G01AF20, G01AX20, G01AX66, G01AX67, G01AX75, G01AX77, G02BB01, G02CD20, G02CH20, G02CH30, G02CP53, G02CP54, G02CP55, G02CX55, G02CX56, G03CA53, G03CD51, G03CD53, G03GA21, G04BA51, G04BC50, G04BD59, G04BD63, G04BD65, G04BD66, G04BE30, G04BE52, G04BE54, G04BE70, G04BH20, G04BH30, G04BP30, G04BP50, G04BP51, G04BX50, G04CA51, G04CA52, G04CA53, G04CH20, G04CP30, G04CP50, G04CP52, G04CP55, G04CP56, G04CX54, H03AA03, H03AA51, H03AA53, H03BB52, H03BH20, H03BP51, H03CA51, J01AA20, J01AA56, J01AA57, J01BA51, J01BA52, J01CA20, J01CA51, J01CE30, J01CE52, J01DD54, J01DD62, J01DH51, J01DH55, J01EB20, J01EB59, J01EB70, J01EC20, J01EC52, J01ED20, J01GB53, J01GB55, J01GB64, J01XE51, J01XX55, J04AC51, J04AM01, J04AM02, J04AM03, J04AM04, J04AM07, J05AR01, J05AR02, J05AR03, J05AR10, J05AX51, J06BB30, J07AE51, J07AG51, J07AG52, J07AG53, J07AJ51, J07AJ52, J07AM51, J07AM52, J07AP10, J07AX52, J07AX53, J07BC20, J07BD51, J07BD52, J07BD53, J07BD54, J07BJ51, L01BC52, L01BC53, L01BC63, L01CP50, L03AB60, L03AB61, L03AG50, L03AG51, L03AH20, L03AH50, L03AP50, L03AP51, L03AP52, L03AP53, L03AX50, L03AX71, M01AA51, M01AA52, M01AA53, M01AB51, M01AB55, M01AB69, M01AC56, M01AE51, M01AE52, M01AE53, M01AE56, M01AX55, M01AX68, M02AA54, M02AA56, M02AA73, M02AA78, M02AA79, M02AB51, M02AB53, M02AC50, M02AC51, M02AC52, M02AC53, M02AC54, M02AC55, M02AC56, M02AC57, M02AD50, M02AD51, M02AD52, M02AD53, M02AH20, M02AH50, M02AP30, M02AP51, M02AP52, M02AP56, M02AP57, M02AP58, M02AP59, M02AX20, M02AX30, M02AX53, M02AX54, M02AX56, M02AX69, M02AX76, M02BA54, M02BA55, M02BB51, M02BB52, M02BB53, M02BB56, M02BB59, M02BP50, M02BP51, M02BP52, M02BP53, M02BX51, M02BX55, M03BA51, M03BA52, M03BA53, M03BA57, M03BA71, M03BA72, M03BA73, M03BB52, M03BB53, M03BB72, M03BB73, M03BC51, M03BC51, M03BX54, M03BX54, M04AA51, M04AA51, M04AH20, M05BB01, M05BB02, M05BB03, M05BB06, M05BB07, M05BB08, M05BB09, M05BX53, M09AA52, M09AA72, M09AB52, M09AH20, M09AH50, M09AP30, M09AX03, M09AX55, N01AH51, N01AX63, N01BA52, N01BA53, N01BB20, N01BB51, N01BB52, N01BB53, N01BB54, N01BB57, N01BB58, N01BH20, N01BX50, N02AA51, N02AA55, N02AA57, N02AA58, N02AA59, N02AA64, N02AA65, N02AA66, N02AA69, N02AA79, N02AB52, N02AB72, N02AC52, N02AC54, N02AC74, N02AX51, N02AX52, N02AX62, N02BA20, N02BA51, N02BA55, N02BA57, N02BA59, N02BA65, N02BA71, N02BA75, N02BA77, N02BA79, N02BB51, N02BB52, N02BB53, N02BB54, N02BB56, N02BB71, N02BB72, N02BB73, N02BB74, N02BB76, N02BE51, N02BE53, N02BE54, N02BE61, N02BE71, N02BE73, N02BE74, N02BH20, N02CA51, N02CA52, N02CA71, N02CA72, N02CH20, N02CP52, N02CX57, N02CX58, N02CX59, N03AB52, N03AB54, N03AD51, N04AH20, N04BA05, N04BA06, N04BA10, N04BA11, N05BA56, N05BB51, N05BC51, N05CP30, N05CP50, N05CP51, N05CP52, N05HH20, N05HH50, N06AP51, N06BX54, N06BX64, N06DA52, N06DX10, N06DX57, N06DX66,

| Combination drugs              | ATC codes                                                                                                                                                                                                                                                                                                                                                                                                                                                                                                                                                                                                                                                                                                                                                                                                                                                                                                                                                                                                                                                                                                                                                                                                                                                                                                                                                                                                                                                                                                                                                                                                                                                                                                                                                                                                                                                                                                                                                                                                                                                                                                                                                                                                                                                                                                                                                                                                                                                                                                                                      |
|--------------------------------|------------------------------------------------------------------------------------------------------------------------------------------------------------------------------------------------------------------------------------------------------------------------------------------------------------------------------------------------------------------------------------------------------------------------------------------------------------------------------------------------------------------------------------------------------------------------------------------------------------------------------------------------------------------------------------------------------------------------------------------------------------------------------------------------------------------------------------------------------------------------------------------------------------------------------------------------------------------------------------------------------------------------------------------------------------------------------------------------------------------------------------------------------------------------------------------------------------------------------------------------------------------------------------------------------------------------------------------------------------------------------------------------------------------------------------------------------------------------------------------------------------------------------------------------------------------------------------------------------------------------------------------------------------------------------------------------------------------------------------------------------------------------------------------------------------------------------------------------------------------------------------------------------------------------------------------------------------------------------------------------------------------------------------------------------------------------------------------------------------------------------------------------------------------------------------------------------------------------------------------------------------------------------------------------------------------------------------------------------------------------------------------------------------------------------------------------------------------------------------------------------------------------------------------------|
| Containing 2 active substances | N07AA51, N07BC51, N07CA52, N07CH20, N07XB52, N07XB54, N07XB56, N07XH20, N07XX59, P01AA52, P01AR53, P01AX52, P01BB51, P01BD51, P01BF01, P01BF02, P01BF03, P01BF05, P01BF06, P02CA51, P02CX50, P03AA54, P03AB51, P03AC52, P03AC53, P03AC54, P03AP51, R01AC51, R01AD52, R01AD53, R01AD57, R01AD58, R01AD60, R01AD61, R01AD64, R01AH20, R01AH50, R01AP56, R01AX30, R01BA51, R01BA52, R01BA53, R01BA54, R01BA56, R01BA57, R01BH20, R01BP30, R02AA50, R02AA51, R02AA52, R02AA55, R02AA56, R02AA59, R02AA71, R02AA72, R02AA73, R02AA74, R02AA82, R02AA84, R02AB20, R02AB52, R02AB54, R02AB80, R02AD50, R02AD51, R02AD52, R02AH20, R02AP30, R02AP52, R02AX50, R02AX52, R03AA51, R03AA52, R03AB52, R03AB53, R03CA51, R03CA52, R03CA53, R03CB51, R03CB53, R03CC53, R03CC54, R03CC63, R03DA20, R03DA50, R03DA51, R03DA52, R03DA53, R03DA54, R03DA55, R03DA57, R03DA63, R03DA73, R03DA74, R03DA82, R03DA90, R03DH20, R03DX50, R04AH20, R04AH50, R04AP30, R04AP50, R04AX53, R05CA10, R05CA50, R05CA51, R05CB10, R05CB50, R05CB52, R05CH20, R05CH50, R05CP30, R05CP51, R05CP59, R05DA20, R05DA50, R05DA54, R05DA56, R05DA59, R05DA64, R05DB20, R05DB53, R05DB54, R05DB55, R05DB68, R05DB80, R05XA01, R05XA02, R05XA03, R05XA04, R05XA05, R05XA06, R05XA07, R05XA08, R05XA09, R05XA10, R05XA12, R05XC01, R05XC02, R05XH20, R05XH51, R05XH52, R06AA52, R06AA54, R06AA56, R06AA57, R06AA59, R06AB51, R06AB52, R06AB54, R06AB56, R06AC52, R06AC53, R06AD52, R06AD55, R06AE51, R06AE53, R06AE55, R06AE57, R06AX51, R06AX53, R06AX57, R06AX58, R06AX80, R07AA30, R07AB50, R07AB52, R07AB53, R07AH20, S01AA20, S01AA30, S01AB20, S01AX20, S01CA01, S01CA02, S01CA03, S01CA04, S01CA05, S01CA06, S01CA07, S01CA08, S01CA09, S01CA10, S01CA11, S01CA12, S01CA13, S01CA21, S01CA22, S01CA52, S01CA53, S01CA54, S01CA56, S01CA57, S01EA51, S01EA52, S01EB51, S01EB58, S01ED51, S01ED52, S01ED54, S01ED55, S01ED61, S01ED62, S01ED63, S01ED66, S01ED67, S01ED68, S01ED69, S01FA51, S01FA56, S01GA50, S01GA51, S01GA52, S01GA53, S01GA55, S01GA56, S01GX51, S01HA30, S01JA51, S01KA51, S01XA30, S01XA50, S01XA52, S01XA76, S01XA85, S01XA86, S01XA87, S01XA89, S01XB50, S01XB52, S01XB53, S01XB54, S01XC20, S01XC51, S01XC55, S01XC56, S01XC57, S01XC58, S01XH20, S01XH51, S02AA30, S02BA56, S02DA30, S02DA51, S02DA55, S02DA57, S02DC30, S02DH20, S02DH50, S03AA30, V03AB05, V03AE04, V03AK50, V03AX50, V04BA20, V04CM20, V04CN20, V04CO20, V04CX50, V04CX51, V04CZ02, V04CZ04, V04CZ05, V04CZ10, V06BA50, V06CA50, V06CX50, V06DC20, V06DC51, V07AN50, V07LH04, V08AA20 |
| Containing 3 active substances | C07D, A02BD, A11DB03, A11DB04, A12AX51, B03AE01, B03AE02, B03AE04, C02LA51, C02LA52, C02LA58, C02LA71, C02LC51, C02LG51, C02LG73, C07FB25, C08GA53, C09BX01, C09DX01, C09DX03, C09XA54, C10BX04, G01BE50, J04AM05, J04AM06, J05AR04, J05AR05, J05AR06, J05AR07, J05AR08, J05AR09, J05AR11, L01BC73, M05BB04, M05BB05, M05BB10, N04BA03, P01BF04, S01CA55                                                                                                                                                                                                                                                                                                                                                                                                                                                                                                                                                                                                                                                                                                                                                                                                                                                                                                                                                                                                                                                                                                                                                                                                                                                                                                                                                                                                                                                                                                                                                                                                                                                                                                                                                                                                                                                                                                                                                                                                                                                                                                                                                                                       |

**Table S2. List of ATC codes or ATC code groups excluded from the count of drugs for the modified polypharmacy definition**

| <b>Exclusion Criteria</b>                                          | <b>ATC codes</b>                                                                                                                                                                                                                                                                                                                                                              |
|--------------------------------------------------------------------|-------------------------------------------------------------------------------------------------------------------------------------------------------------------------------------------------------------------------------------------------------------------------------------------------------------------------------------------------------------------------------|
| Food supplements                                                   | A11, V06, A12, A13, A02X, C10AX06                                                                                                                                                                                                                                                                                                                                             |
| Homeopathic or anthroposophical drugs                              | V60, N05H, A01AH, A03AH, A04AH, A05AH, A05BH, A07XH, A08AH, A09AH, A10XH, B03XH, C01AH, C01CH, C01EH, C02KH, C03XH, C04AH, C05AH, C05CH, C06AH, D05BH, D10BH, G02CH, G04BH, G04CH, H03BH, H05AH, L01CH, L03AH, M02AH, M04AH, M09AH, N01BH, N02BH, N02CH, N04AH, N06AH, N07CH, N07XH, R01AH, R01BH, R03DH, R05CH, R05FH, R05XH, R07AH, S02DH, R05CP, R05DP02, R05DP04, R05DP07 |
| Herbal drugs (Selection)                                           | A03AP, C05AP, R05DP                                                                                                                                                                                                                                                                                                                                                           |
| Non-systemic acting drugs                                          | D02, D03, D04, D08, D09, D11, R01A, R02, R04, S01, V04, V07, V08, V09, V20, D01A, D06A, M02A, M02B, P03A, P03B, A01AA, A01AP, D07AA, D07BA, D07CA, D07XA, G02CD, M09AX, S02DC, C10AX13                                                                                                                                                                                        |
| Antithrombotic agents for short term use <sup>a</sup>              | B01A                                                                                                                                                                                                                                                                                                                                                                          |
| NSAIDs for short term use <sup>a</sup>                             | M01A, B01AC06, N02BA01, N02BA51, N02BA71, M01BA01, M01BA03                                                                                                                                                                                                                                                                                                                    |
| Drugs against peptic ulcer disease for short term use <sup>a</sup> | A02B                                                                                                                                                                                                                                                                                                                                                                          |

<sup>a</sup> Short-term use was assumed if the drug was only reported in the hospital discharge letter but not in the interview with the patient.

**Table S3. Associations of the baseline characteristics of older colorectal cancer patients with polypharmacy (traditional definition).**

| Variables                               | N <sub>total</sub> | Polypharmacy       |                                  |                                        |
|-----------------------------------------|--------------------|--------------------|----------------------------------|----------------------------------------|
|                                         |                    | N (%) <sup>a</sup> | Age and sex adjusted OR [95% CI] | Multivariable <sup>b</sup> OR [95% CI] |
| Sex                                     |                    |                    |                                  |                                        |
| Female                                  | 1334               | 926 (69.4)         | Ref                              | Ref                                    |
| Male                                    | 1905               | 1222 (64.2)        | <b>0.84 [0.72-0.97]</b>          | <b>0.65 [0.51-0.83]</b>                |
| Age at CRC diagnosis                    |                    |                    |                                  |                                        |
| Per 1-year increase                     | -                  | -                  | <b>1.05 [1.04-1.06]</b>          | 1.01 [0.99-1.02]                       |
| Years of schooling                      |                    |                    |                                  |                                        |
| ≤9                                      | 2318               | 1576 (68.0)        | Ref                              | Ref                                    |
| 10-11                                   | 486                | 307 (63.2)         | <b>0.80 [0.65-0.98]</b>          | 0.97 [0.75-1.25]                       |
| ≥12                                     | 435                | 265 (60.9)         | <b>0.79 [0.64-0.98]</b>          | 0.95 [0.73-1.24]                       |
| Year of CRC diagnosis                   |                    |                    |                                  |                                        |
| 2003-2007                               | 1098               | 646 (58.8)         | Ref                              | Ref                                    |
| 2008-2012                               | 1223               | 834 (68.2)         | <b>1.50 [1.26-1.78]</b>          | <b>1.84 [1.48-2.29]</b>                |
| 2013-2016                               | 918                | 668 (72.8)         | <b>1.83 [1.51-2.22]</b>          | <b>2.44 [1.90-3.12]</b>                |
| Tumor location                          |                    |                    |                                  |                                        |
| Colon                                   | 2088               | 1404 (67.2)        | Ref                              | Ref                                    |
| Rectum                                  | 1151               | 744 (64.6)         | 0.96 [0.83-1.12]                 | 1.17 [0.97-1.42]                       |
| Tumor stage                             |                    |                    |                                  |                                        |
| I                                       | 769                | 524 (68.1)         | Ref                              | Ref                                    |
| II                                      | 1082               | 733 (67.7)         | 0.94 [0.77-1.15]                 | 1.00 [0.79-1.28]                       |
| III                                     | 985                | 638 (64.8)         | 0.84 [0.68-1.02]                 | 1.17 [0.86-1.60]                       |
| IV                                      | 403                | 253 (62.8)         | 0.82 [0.63-1.06]                 | 1.17 [0.81-1.69]                       |
| (Neo-) adjuvant chemotherapy            |                    |                    |                                  |                                        |
| Yes                                     | 1211               | 723 (59.7)         | <b>0.72 [0.61-0.83]</b>          | <b>0.76 [0.59-0.99]</b>                |
| No                                      | 2028               | 1425 (70.3)        | Ref                              | Ref                                    |
| BMI (kg/m <sup>2</sup> )                |                    |                    |                                  |                                        |
| < 25                                    | 1197               | 721 (60.2)         | Ref                              | Ref                                    |
| 25-29.9                                 | 1417               | 950 (67.0)         | <b>1.45 [1.23-1.71]</b>          | 1.04 [0.85-1.27]                       |
| ≥30                                     | 625                | 477 (76.3)         | <b>2.47 [1.98-3.09]</b>          | <b>1.33 [1.01-1.73]</b>                |
| Lifetime physical activity (MET-h/week) |                    |                    |                                  |                                        |
| T1                                      | 1079               | 715 (66.3)         | Ref                              | Ref                                    |
| T2                                      | 1080               | 738 (68.3)         | 1.09 [0.91-1.31]                 | 1.01 [0.81-1.26]                       |
| T3                                      | 1080               | 695 (64.4)         | 1.00 [0.83-1.20]                 | 1.01 [0.80-1.27]                       |
| Smoking status                          |                    |                    |                                  |                                        |
| Never smoker                            | 1466               | 956 (65.2)         | Ref                              | Ref                                    |
| Former smoker                           | 1473               | 1011 (68.6)        | <b>1.42 [1.20-1.69]</b>          | <b>1.30 [1.06-1.61]</b>                |
| Current smoker                          | 300                | 181 (60.3)         | 1.06 [0.82-1.39]                 | 1.19 [0.87-1.64]                       |
| Lifetime alcohol consumption            |                    |                    |                                  |                                        |
| None                                    | 603                | 420 (69.7)         | Ref                              | Ref                                    |
| T1                                      | 873                | 597 (68.4)         | 1.04 [0.82-1.31]                 | 1.14 [0.86-1.50]                       |
| T2                                      | 883                | 544 (61.6)         | 0.85 [0.66-1.09]                 | 0.95 [0.71-1.28]                       |
| T3                                      | 880                | 587 (66.7)         | 1.16 [0.90-1.51]                 | 1.20 [0.87-1.66]                       |
| Red meat consumption                    |                    |                    |                                  |                                        |
| <1 time/week                            | 259                | 179 (69.1)         | Ref                              | Ref                                    |
| 1 time/week                             | 735                | 480 (65.3)         | 0.86 [0.63-1.17]                 | 0.93 [0.63-1.36]                       |
| Multiple times per week                 | 2245               | 1489 (66.3)        | 0.96 [0.72-1.28]                 | 0.92 [0.64-1.32]                       |
| Processed meat consumption              |                    |                    |                                  |                                        |
| <1 time/week                            | 406                | 272 (67.0)         | Ref                              | Ref                                    |
| 1 time/week                             | 426                | 268 (62.9)         | 0.85 [0.64-1.14]                 | 0.88 [0.62-1.25]                       |
| Multiple times per week                 | 2407               | 1608 (66.8)        | 1.07 [0.85-1.34]                 | 1.06 [0.79-1.42]                       |
| Functional status                       |                    |                    |                                  |                                        |
| Excellent                               | 629                | 377 (59.9)         | Ref                              | Ref                                    |
| Fair                                    | 1214               | 739 (60.9)         | 1.05 [0.83-1.31]                 | 1.08 [0.84-1.40]                       |
| Poor                                    | 1396               | 1032 (73.9)        | <b>1.73 [1.34-2.23]</b>          | <b>1.40 [1.03-1.89]</b>                |
| Comorbidity                             |                    |                    |                                  |                                        |
| Hypertension                            |                    |                    |                                  |                                        |
| No                                      | 984                | 377 (38.3)         | Ref                              | Ref                                    |
| Yes                                     | 2255               | 1771 (78.5)        | <b>5.64 [4.79-6.65]</b>          | <b>4.15 [3.44-5.00]</b>                |

| Variables                        | N <sub>total</sub> | Polypharmacy       |                                  |                                        |
|----------------------------------|--------------------|--------------------|----------------------------------|----------------------------------------|
|                                  |                    | N (%) <sup>a</sup> | Age and sex adjusted OR [95% CI] | Multivariable <sup>b</sup> OR [95% CI] |
| Cardiac insufficiency            |                    |                    |                                  |                                        |
| No                               | 2560               | 1565 (61.1)        | Ref                              | Ref                                    |
| Yes                              | 679                | 583 (85.9)         | <b>3.41 [2.70-4.31]</b>          | <b>1.58 [1.20-2.08]</b>                |
| Acute coronary syndrome          |                    |                    |                                  |                                        |
| No                               | 2845               | 1797 (63.2)        | Ref                              | Ref                                    |
| Yes                              | 394                | 351 (89.1)         | <b>4.64 [3.34-6.44]</b>          | <b>1.94 [1.32-2.84]</b>                |
| History of myocardial infarction |                    |                    |                                  |                                        |
| No                               | 2640               | 1607 (60.9)        | Ref                              | Ref                                    |
| Yes                              | 599                | 541 (90.3)         | <b>5.96 [4.48-7.92]</b>          | <b>2.95 [2.13-4.10]</b>                |
| History of stroke                |                    |                    |                                  |                                        |
| No                               | 2849               | 1821 (63.9)        | Ref                              | Ref                                    |
| Yes                              | 390                | 327 (83.9)         | <b>2.71 [2.04-3.60]</b>          | <b>1.92 [1.39-2.65]</b>                |
| Atrial fibrillation              |                    |                    |                                  |                                        |
| No                               | 2816               | 1774 (63.0)        | Ref                              | Ref                                    |
| Yes                              | 423                | 374 (88.4)         | <b>4.06 [2.98-5.54]</b>          | <b>2.85 [2.01-4.03]</b>                |
| COPD                             |                    |                    |                                  |                                        |
| No                               | 2933               | 1901 (64.8)        | Ref                              | Ref                                    |
| Yes                              | 306                | 247 (80.7)         | <b>2.27 [1.69-3.06]</b>          | <b>1.97 [1.40-2.78]</b>                |
| Type II diabetes mellitus        |                    |                    |                                  |                                        |
| No                               | 2403               | 1434 (59.7)        | Ref                              | Ref                                    |
| Yes                              | 836                | 714 (85.4)         | <b>3.94 [3.20-4.87]</b>          | <b>2.63 [2.07-3.33]</b>                |
| Depression                       |                    |                    |                                  |                                        |
| No                               | 2985               | 1945 (65.2)        | Ref                              | Ref                                    |
| Yes                              | 254                | 203 (79.9)         | <b>2.19 [1.59-3.02]</b>          | <b>2.14 [1.48-3.10]</b>                |
| Chronic pain                     |                    |                    |                                  |                                        |
| No                               | 1274               | 752 (59.0)         | Ref                              | Ref                                    |
| Yes                              | 1965               | 1396 (71.0)        | <b>1.63 [1.41-1.90]</b>          | <b>1.37 [1.14-1.64]</b>                |
| Gastrointestinal illness         |                    |                    |                                  |                                        |
| No                               | 2531               | 1652 (65.3)        | Ref                              | Ref                                    |
| Yes                              | 708                | 496 (70.1)         | <b>1.24 [1.03-1.49]</b>          | 1.22 [0.98-1.52]                       |
| Anemia                           |                    |                    |                                  |                                        |
| No                               | 2896               | 1902 (65.7)        | Ref                              | Ref                                    |
| Yes                              | 343                | 246 (71.7)         | 1.19 [0.92-1.53]                 | 1.08 [0.79-1.47]                       |
| Hypothyroidism                   |                    |                    |                                  |                                        |
| No                               | 3072               | 2005 (65.3)        | Ref                              | Ref                                    |
| Yes                              | 167                | 143 (85.6)         | <b>3.12 [2.00-4.86]</b>          | <b>2.57 [1.57-4.21]</b>                |

Values in bold are statistically significant ( $p < 0.05$ )

Abbreviations: BMI, body mass index; CI, confidence interval; COPD, chronic obstructive pulmonary disease; MET, metabolic equivalent of task; OR, odds ratio; Ref, reference.

<sup>a</sup> The column N(%) was calculated using the imputation dataset 1.

<sup>b</sup> Effect estimates of a multivariable model comprising all variables shown in this table.

**Table S4. The associations of polypharmacy (traditional definition) with up to 5-year overall, colorectal cancer specific, and non-cancer specific survival in older CRC patients**

|                                            | N <sub>total</sub> | N <sub>cases</sub> (%) | Model 1 <sup>a</sup><br>HR [95% CI] | Model 2 <sup>b</sup><br>HR [95% CI] | Model 3 <sup>c</sup><br>HR [95% CI] |
|--------------------------------------------|--------------------|------------------------|-------------------------------------|-------------------------------------|-------------------------------------|
| <b>Overall Survival</b>                    |                    |                        |                                     |                                     |                                     |
| 0-4 drugs                                  | 1091               | 316 (29.0)             | Ref                                 | Ref                                 | Ref                                 |
| 5-7 drugs                                  | 1123               | 358 (31.9)             | 1.06 [0.91-1.23]                    | 1.10 [0.95-1.29]                    | 1.04 [0.88-1.22]                    |
| ≥8 drugs                                   | 1025               | 396 (38.6)             | <b>1.25 [1.08-1.46]</b>             | <b>1.36 [1.17-1.59]</b>             | 1.16 [0.96-1.39]                    |
| <b>Colorectal Cancer Specific Survival</b> |                    |                        |                                     |                                     |                                     |
| 0-4 drugs                                  | 1069               | 211 (19.7)             | Ref                                 | Ref                                 | Ref                                 |
| 5-7 drugs                                  | 1092               | 208 (19.1)             | 0.96 [0.79-1.16]                    | 1.02 [0.84-1.24]                    | 1.05 [0.85-1.29]                    |
| ≥8 drugs                                   | 984                | 196 (19.9)             | 1.00 [0.82-1.22]                    | 1.17 [0.95-1.44]                    | 1.23 [0.96-1.57]                    |
| <b>Non-Cancer Specific Survival</b>        |                    |                        |                                     |                                     |                                     |
| 0-4 drugs                                  | 1069               | 57 (5.3)               | Ref                                 | Ref                                 | Ref                                 |
| 5-7 drugs                                  | 1092               | 97 (8.9)               | <b>1.46 [1.05-2.03]</b>             | <b>1.46 [1.05-2.04]</b>             | 1.18 [0.83-1.67]                    |
| ≥8 drugs                                   | 984                | 142 (14.4)             | <b>2.23 [1.63-3.04]</b>             | <b>2.22 [1.61-3.06]</b>             | 1.27 [0.88-1.84]                    |

**Values in bold are statistically significant (p<0.05)**

Abbreviations: CI, confidence interval; HR, hazard ratio.

<sup>a</sup> Adjusted for age and sex.

<sup>b</sup> Adjusted for age, sex, tumor stage, tumor location, year of CRC diagnosis, neoadjuvant/adjuvant chemotherapy, year of schooling, smoking status, BMI, lifetime physical activity, lifetime alcohol consumption, red meat consumption, and processed meat consumption.

<sup>c</sup> Adjusted for variables of model 2, functional status, and comorbidity.

**Table S5. Subgroup analyses for the associations of polypharmacy (traditional definition) with up to 5-year overall survival in older colorectal cancer patients**

| Age               | 65-74 Years        |                        |                          | ≥ 75 years         |                        |                          |                    |                        |                          |
|-------------------|--------------------|------------------------|--------------------------|--------------------|------------------------|--------------------------|--------------------|------------------------|--------------------------|
|                   | N <sub>total</sub> | N <sub>cases</sub> (%) | HR [95% CI] <sup>a</sup> | N <sub>total</sub> | N <sub>cases</sub> (%) | HR [95% CI] <sup>a</sup> |                    |                        |                          |
| 0-4 drugs         | 651                | 163 (25.0)             | Ref                      | 440                | 153 (34.8)             | Ref                      |                    |                        |                          |
| 5-7 drugs         | 585                | 147 (25.1)             | 1.03 [0.80-1.31]         | 538                | 211 (39.2)             | 1.12 [0.90-1.41]         |                    |                        |                          |
| ≥8 drugs          | 416                | 127 (30.5)             | <b>1.36 [1.00-1.84]</b>  | 609                | 269 (44.2)             | 1.17 [0.92-1.49]         |                    |                        |                          |
| Sex               | Female             |                        |                          | Male               |                        |                          |                    |                        |                          |
|                   | N <sub>total</sub> | N <sub>cases</sub> (%) | HR [95% CI] <sup>a</sup> | N <sub>total</sub> | N <sub>cases</sub> (%) | HR [95% CI] <sup>a</sup> |                    |                        |                          |
| 0-4 drugs         | 408                | 118 (28.9)             | Ref                      | 683                | 198 (29.0)             | Ref                      |                    |                        |                          |
| 5-7 drugs         | 455                | 149 (32.8)             | 1.08 [0.83-1.41]         | 668                | 209 (31.3)             | 0.99 [0.80-1.22]         |                    |                        |                          |
| ≥8 drugs          | 471                | 186 (39.5)             | 1.32 [0.99-1.77]         | 554                | 210 (37.9)             | 1.05 [0.82-1.34]         |                    |                        |                          |
| Tumor location    | Colon              |                        |                          | Rectum             |                        |                          |                    |                        |                          |
|                   | N <sub>total</sub> | N <sub>cases</sub> (%) | HR [95% CI] <sup>a</sup> | N <sub>total</sub> | N <sub>cases</sub> (%) | HR [95% CI] <sup>a</sup> |                    |                        |                          |
| 0-4 drugs         | 684                | 210 (30.7)             | Ref                      | 407                | 106 (26.0)             | Ref                      |                    |                        |                          |
| 5-7 drugs         | 720                | 229 (31.8)             | 0.92 [0.75-1.13]         | 403                | 129 (32.0)             | 1.28 [0.97-1.69]         |                    |                        |                          |
| ≥8 drugs          | 684                | 263 (38.5)             | 1.03 [0.82-1.30]         | 341                | 133 (39.0)             | <b>1.46 [1.05-2.03]</b>  |                    |                        |                          |
| Chemotherapy      | No Chemotherapy    |                        |                          | Chemotherapy       |                        |                          |                    |                        |                          |
|                   | N <sub>total</sub> | N <sub>cases</sub> (%) | OR [95% CI] <sup>a</sup> | N <sub>total</sub> | N <sub>cases</sub> (%) | OR [95% CI] <sup>a</sup> |                    |                        |                          |
| 0-4 drugs         | 603                | 136 (22.6)             | Ref                      | 488                | 180 (36.9)             | Ref                      |                    |                        |                          |
| 5-7 drugs         | 707                | 180 (25.5)             | 0.92 [0.67-1.27]         | 414                | 177 (42.8)             | 1.27 [0.91-1.79]         |                    |                        |                          |
| ≥8 drugs          | 717                | 256 (35.7)             | 1.14 [0.81-1.61]         | 307                | 139 (45.3)             | 1.26 [0.84-1.91]         |                    |                        |                          |
| Tumor stage       | Stage I and II     |                        |                          | Stage III          |                        |                          | Stage IV           |                        |                          |
|                   | N <sub>total</sub> | N <sub>cases</sub> (%) | HR [95% CI] <sup>a</sup> | N <sub>total</sub> | N <sub>cases</sub> (%) | HR [95% CI] <sup>a</sup> | N <sub>total</sub> | N <sub>cases</sub> (%) | HR [95% CI] <sup>a</sup> |
| 0-4 drugs         | 593                | 101 (17.0)             | Ref                      | 341                | 96 (28.2)              | Ref                      | 149                | 117 (78.5)             | Ref                      |
| 5-7 drugs         | 646                | 115 (17.8)             | 0.87 [0.65-1.16]         | 335                | 129 (38.5)             | 1.32 [0.99-1.77]         | 137                | 113 (82.5)             | 1.03 [0.77-1.38]         |
| ≥8 drugs          | 606                | 163 (26.9)             | 0.99 [0.72-1.35]         | 297                | 138 (46.5)             | 1.33 [0.96-1.84]         | 115                | 91 (79.1)              | 1.12 [0.79-1.59]         |
| Functional status | Excellent          |                        |                          | Fair               |                        |                          | Poor               |                        |                          |
|                   | N <sub>total</sub> | N <sub>cases</sub> (%) | HR [95% CI] <sup>a</sup> | N <sub>total</sub> | N <sub>cases</sub> (%) | HR [95% CI] <sup>a</sup> | N <sub>total</sub> | N <sub>cases</sub> (%) | HR [95% CI] <sup>a</sup> |
| 0-4 drugs         | 205                | 41 (20.0)              | Ref                      | 324                | 87 (26.9)              | Ref                      | 198                | 69 (34.9)              | Ref                      |
| 5-7 drugs         | 192                | 42 (21.9)              | 1.27 [0.76-2.11]         | 298                | 83 (27.9)              | 1.10 [0.78-1.55]         | 298                | 133 (44.6)             | 1.22 [0.90-1.67]         |
| ≥8 drugs          | 115                | 35 (30.4)              | 1.68 [0.91-3.08]         | 264                | 89 (33.7)              | 1.28 [0.86-1.88]         | 374                | 159 (42.5)             | 0.99 [0.70-1.40]         |

Values in bold are statistically significant (p<0.05)

Abbreviations: CI, confidence interval; HR, hazard ratio; OR, odds ratio.

<sup>a</sup>Adjusted for age, sex, tumor stage, tumor location, year of CRC diagnosis, neoadjuvant/adjuvant chemotherapy, year of schooling, smoking status, BMI, lifetime physical activity, lifetime alcohol consumption, red meat consumption, processed meat consumption, functional status, and comorbidity except stratifying factor.



**Table S6. The association of polypharmacy (traditional definition) with chemotherapy-related neurological and gastrointestinal adverse drug reactions (ADRs) in older CRC patients**

|                              | <b>N<sub>total</sub></b> | <b>N<sub>cases</sub> (%)</b> | <b>Model 1<sup>a</sup></b><br><b>OR [95% CI]</b> | <b>Model 2<sup>b</sup></b><br><b>OR [95% CI]</b> | <b>Model 3<sup>c</sup></b><br><b>OR [95% CI]</b> |
|------------------------------|--------------------------|------------------------------|--------------------------------------------------|--------------------------------------------------|--------------------------------------------------|
| <b>Neurological ADRs</b>     |                          |                              |                                                  |                                                  |                                                  |
| 0-4 drugs                    | 394                      | 56 (14.2)                    | Ref                                              | Ref                                              | Ref                                              |
| 5-7 drugs                    | 330                      | 55 (16.7)                    | 1.27 [0.84-1.91]                                 | 1.16 [0.89-1.51]                                 | 1.15 [0.87-1.51]                                 |
| ≥8 drugs                     | 237                      | 33 (13.9)                    | 1.06 [0.66-1.70]                                 | 1.08 [0.80-1.47]                                 | 1.13 [0.80-1.59]                                 |
| <b>Gastrointestinal ADRs</b> |                          |                              |                                                  |                                                  |                                                  |
| 0-4 drugs                    | 394                      | 139 (35.3)                   | Ref                                              | Ref                                              | Ref                                              |
| 5-7 drugs                    | 330                      | 110 (33.3)                   | 0.88 [0.65-1.20]                                 | 0.96 [0.79-1.18]                                 | 0.96 [0.78-1.18]                                 |
| ≥8 drugs                     | 237                      | 77 (32.5)                    | 0.84 [0.59-1.18]                                 | 1.01 [0.80-1.26]                                 | 1.01 [0.78-1.31]                                 |

**Values in bold are statistically significant (p<0.05)**

Abbreviations: CI, confidence interval; OR, odds ratio.

<sup>a</sup> Adjusted for age and sex.

<sup>b</sup> Adjusted for age, sex, tumor stage, tumor location, year of CRC diagnosis, year of schooling, smoking status, BMI, lifetime physical activity, lifetime alcohol consumption, red meat consumption, and processed meat consumption.

<sup>c</sup> Adjusted for variables of model 2, functional status, and comorbidity.

**Table S7. The associations of polypharmacy (modified definition) with overall, colorectal cancer specific, and non-cancer specific survival in older CRC patients during up to 17 years of follow-up**

|                                            | N <sub>total</sub> | N <sub>cases</sub> (%) | Model 1 <sup>a</sup><br>HR [95% CI] | Model 2 <sup>b</sup><br>HR [95% CI] | Model 3 <sup>c</sup><br>HR [95% CI] |
|--------------------------------------------|--------------------|------------------------|-------------------------------------|-------------------------------------|-------------------------------------|
| <b>Overall Survival</b>                    |                    |                        |                                     |                                     |                                     |
| 0-4 drugs                                  | 1467               | 670 (45.7)             | Ref                                 | Ref                                 | Ref                                 |
| 5-7 drugs                                  | 988                | 502 (50.8)             | <b>1.15 [1.02-1.29]</b>             | <b>1.21 [1.08-1.36]</b>             | 1.12 [0.98-1.27]                    |
| ≥8 drugs                                   | 784                | 446 (56.9)             | <b>1.38 [1.22-1.56]</b>             | <b>1.46 [1.29-1.66]</b>             | <b>1.23 [1.06-1.43]</b>             |
| <b>Colorectal Cancer Specific Survival</b> |                    |                        |                                     |                                     |                                     |
| 0-4 drugs                                  | 1432               | 345 (24.1)             | Ref                                 | Ref                                 | Ref                                 |
| 5-7 drugs                                  | 964                | 227 (23.6)             | 1.00 [0.85-1.18]                    | 1.05 [0.88-1.25]                    | 1.08 [0.89-1.30]                    |
| ≥8 drugs                                   | 749                | 175 (23.4)             | 1.06 [0.88-1.27]                    | 1.21 [0.99-1.46]                    | <b>1.26 [1.00-1.58]</b>             |
| <b>Non-Cancer Specific Survival</b>        |                    |                        |                                     |                                     |                                     |
| 0-4 drugs                                  | 1432               | 196 (13.7)             | Ref                                 | Ref                                 | Ref                                 |
| 5-7 drugs                                  | 964                | 186 (19.3)             | <b>1.46 [1.20-1.79]</b>             | <b>1.46 [1.19-1.79]</b>             | 1.13 [0.90-1.40]                    |
| ≥8 drugs                                   | 749                | 196 (26.2)             | <b>2.09 [1.71-2.56]</b>             | <b>2.13 [1.73-2.62]</b>             | <b>1.35 [1.06-1.72]</b>             |

**Values in bold are statistically significant (p<0.05)**

Abbreviations: CI, confidence interval; HR, hazard ratio.

<sup>a</sup> Adjusted for age and sex.

<sup>b</sup> Adjusted for age, sex, tumor stage, tumor location, year of CRC diagnosis, neoadjuvant/adjuvant chemotherapy, year of schooling, smoking status, BMI, lifetime physical activity, lifetime alcohol consumption, red meat consumption, and processed meat consumption.

<sup>c</sup> Adjusted for variables of model 2, functional status, and comorbidity.

**Table S8. The association of polypharmacy (modified definition) with chemotherapy-related neurological and gastrointestinal adverse drug reactions (ADRs) in older CRC patients**

|                              | <b>N<sub>total</sub></b> | <b>N<sub>cases</sub> (%)</b> | <b>Model 1<sup>a</sup></b><br><b>OR [95% CI]</b> | <b>Model 2<sup>b</sup></b><br><b>OR [95% CI]</b> | <b>Model 3<sup>c</sup></b><br><b>OR [95% CI]</b> |
|------------------------------|--------------------------|------------------------------|--------------------------------------------------|--------------------------------------------------|--------------------------------------------------|
| <b>Neurological ADRs</b>     |                          |                              |                                                  |                                                  |                                                  |
| 0-4 drugs                    | 496                      | 70 (14.1)                    | Ref                                              | Ref                                              | Ref                                              |
| 5-7 drugs                    | 290                      | 52 (17.9)                    | 1.38 [0.93-2.05]                                 | 1.24 [0.93-1.64]                                 | 1.24 [0.92-1.66]                                 |
| ≥8 drugs                     | 175                      | 22 (12.6)                    | 0.94 [0.56-1.59]                                 | 0.95 [0.66-1.34]                                 | 0.95 [0.64-1.41]                                 |
| <b>Gastrointestinal ADRs</b> |                          |                              |                                                  |                                                  |                                                  |
| 0-4 drugs                    | 496                      | 172 (34.7)                   | Ref                                              | Ref                                              | Ref                                              |
| 5-7 drugs                    | 290                      | 98 (33.8)                    | 0.93 [0.68-1.26]                                 | 0.97 [0.78-1.20]                                 | 0.95 [0.76-1.19]                                 |
| ≥8 drugs                     | 175                      | 56 (32.0)                    | 0.85 [0.59-1.23]                                 | 1.00 [0.78-1.29]                                 | 1.00 [0.75-1.33]                                 |

**Values in bold are statistically significant (p<0.05)**

Abbreviations: CI, confidence interval; OR, odds ratio.

<sup>a</sup> Adjusted for age and sex.

<sup>b</sup> Adjusted for age, sex, tumor stage, tumor location, year of CRC diagnosis, year of schooling, smoking status, BMI, lifetime physical activity, lifetime alcohol consumption, red meat consumption, and processed meat consumption.

<sup>c</sup> Adjusted for variables of model 2, functional status, and comorbidity.
